# Supplementary material for: High-quality graphene aerogels for thermally conductive phase change composites with excellent shape stability
Source: Royal Society of Chemistry journal article supplement (doi:10.1039/c8ta00078f), 2018-01-01
Supplement: c8ta00078f1.pdf [file c8ta00078f1.pdf]

## Supporting Information

### **High-Quality Graphene Aerogels for Thermally Conductive Phase Change Composites with Excellent Shape Stability**

Jing Yang<sup>a,b</sup>, Xiaofeng Li<sup>a\*</sup>, Shuang Han<sup>a</sup>, Runzhou Yang<sup>a</sup>, Peng Min<sup>a,c</sup>, Zhong-Zhen Yu<sup>a,c\*</sup>

<sup>a</sup> Beijing Key Laboratory of Advanced Functional Polymer Composites, Beijing University of Chemical Technology, Beijing 100029, China.

<sup>b</sup> School of Materials Science & Engineering, Sun Yat-Sen University, Guangzhou 510275, China

<sup>c</sup> State Key Laboratory of Organic-Inorganic Composites, College of Materials Science and Engineering, Beijing University of Chemical Technology, Beijing 100029, China

E-mail: xfli@mail.buct.edu.cn (X. Li), yuzz@mail.buct.edu.cn (Z.-Z. Yu)

**Table S1.** Densities and porosities of HGAs.

| Sample | Density<br>(g cm <sup>-3</sup> ) | Porosity<br>(%) | BET Surface Area<br>(m <sup>2</sup> g <sup>-1</sup> )* | Pore Size*<br>(nm) |
|--------|----------------------------------|-----------------|--------------------------------------------------------|--------------------|
| HGA-22 | 0.022 ± 0.002                    | 99.1            | 18.3                                                   | 8.7                |
| HGA-28 | 0.028 ± 0.003                    | 98.7            | 13.6                                                   | 9.8                |
| HGA-42 | 0.042 ± 0.003                    | 98.2            | 10.1                                                   | 8.9                |

\* The data measured by nitrogen adsorption and desorption experiments

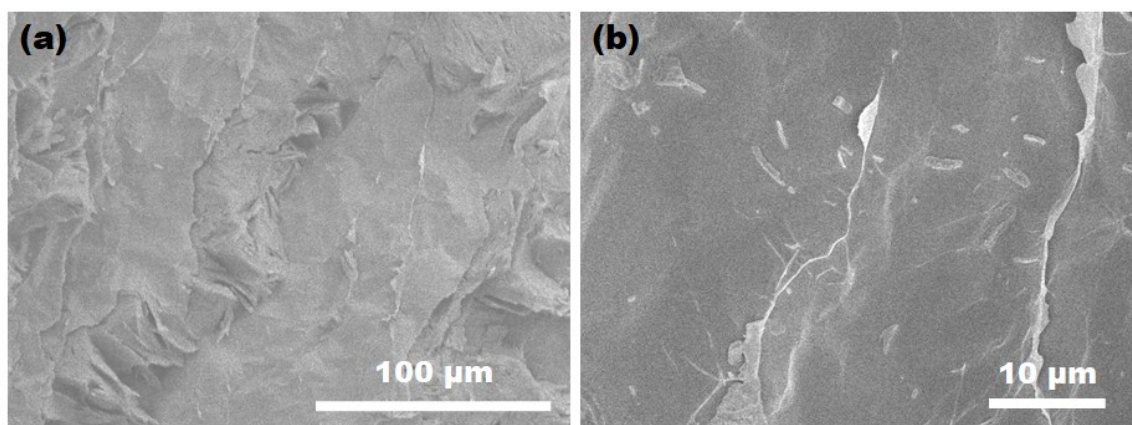

**Figure S1.** SEM images of OHGA-42 composite with different magnifications.

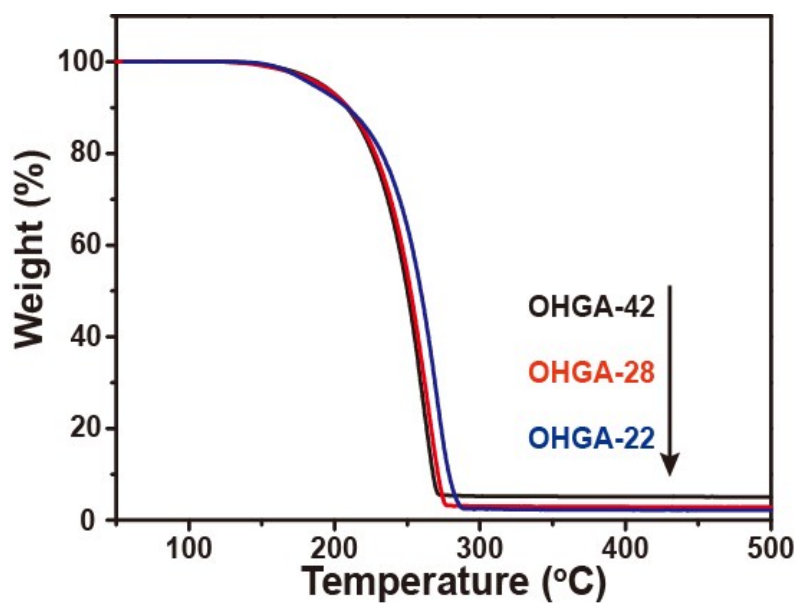

**Figure S2.** TGA curves of OHGA composites at a heating rate of 10 °C min<sup>-1</sup> in a nitrogen atmosphere.

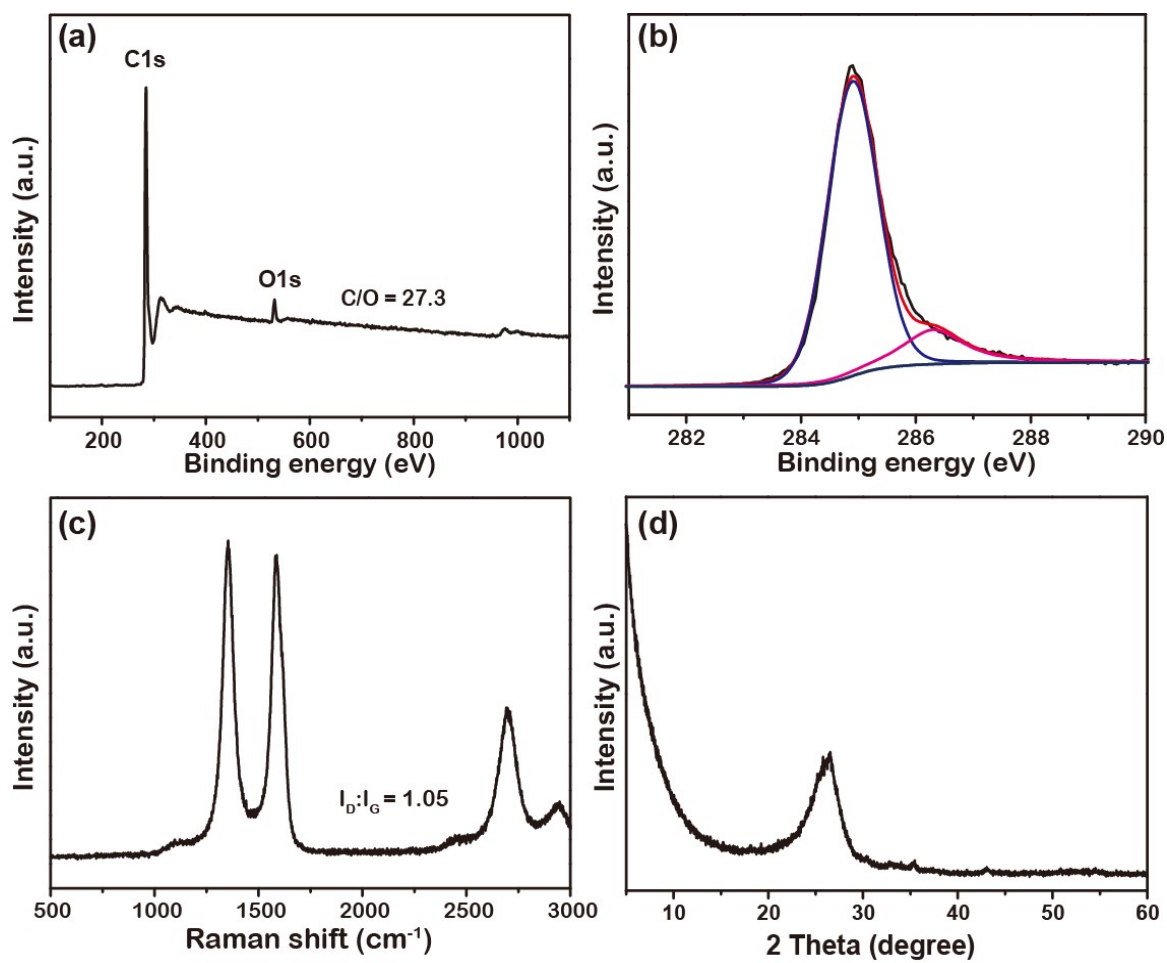

**Figure S3.** (a) XPS broad scan, (b) C 1s spectrum, (c) Raman spectrum, and (d) XRD pattern of graphene aerogel annealed at 1300 °C.

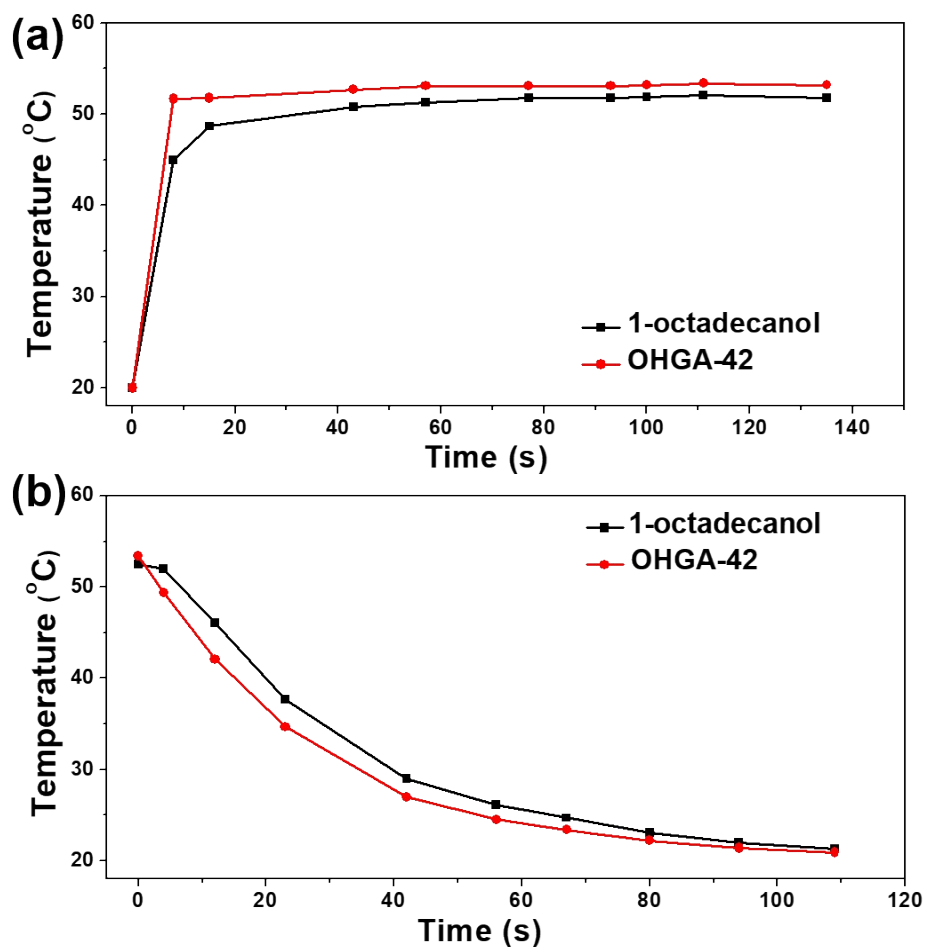

**Figure S4.** Temperature responses of octadecanol and OHGA-42 composite during heating/cooling process at different heating/cooling times.

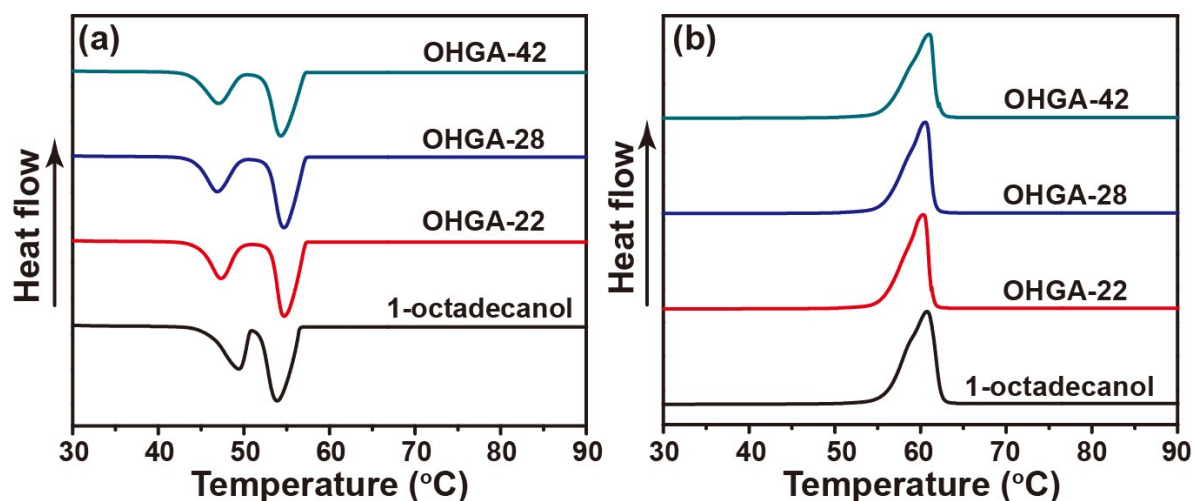

**Figure S5.** (a) Cooling and (b) heating DSC curves of OHGA composites and neat 1-octadecanol at a scanning rate of  $10\text{ }^{\circ}\text{C min}^{-1}$ .

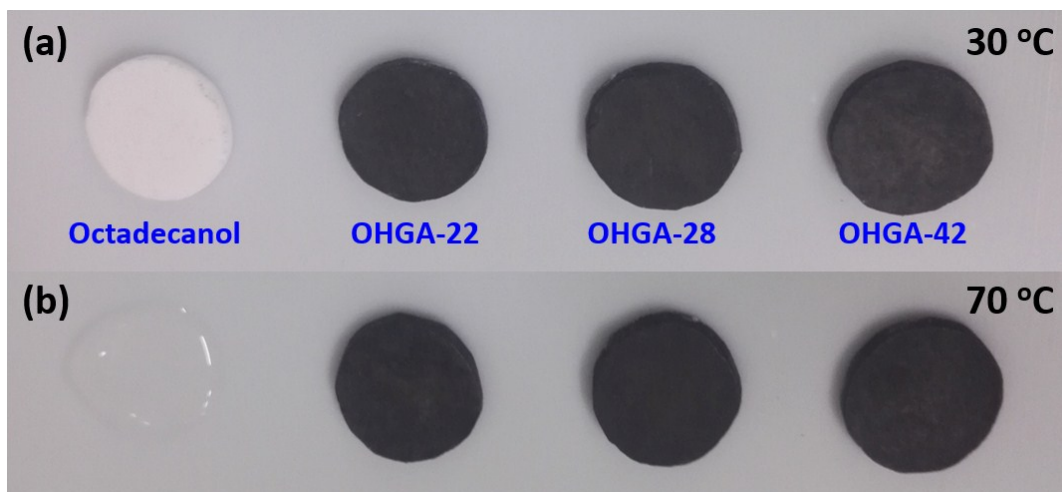

**Figure S6.** Digital photos of 1-octadecanol and OHGA composites at (a) 30 °C and (b) 70 °C.

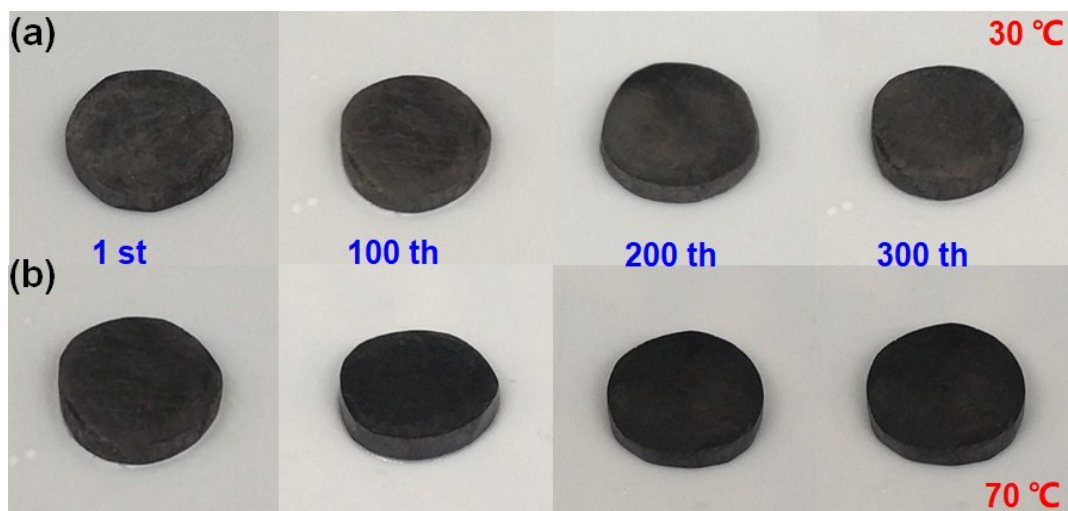

**Figure S7.** Digital photos of OHGA-42 composites after melting/solidification cycles.
